# Supplementary material for: Altered receptor binding, antibody evasion and retention of T cell recognition by the SARS-CoV-2 XBB.1.5 spike protein
Source: PubMed Central journal article supplement (PMC10904792; doi:10.1038/s41467-024-46104-2), 2024-02-29
Supplement: 41467_2024_46104_MOESM1_ESM.pdf [file 41467_2024_46104_MOESM1_ESM.pdf]

## **Supplementary Materials**

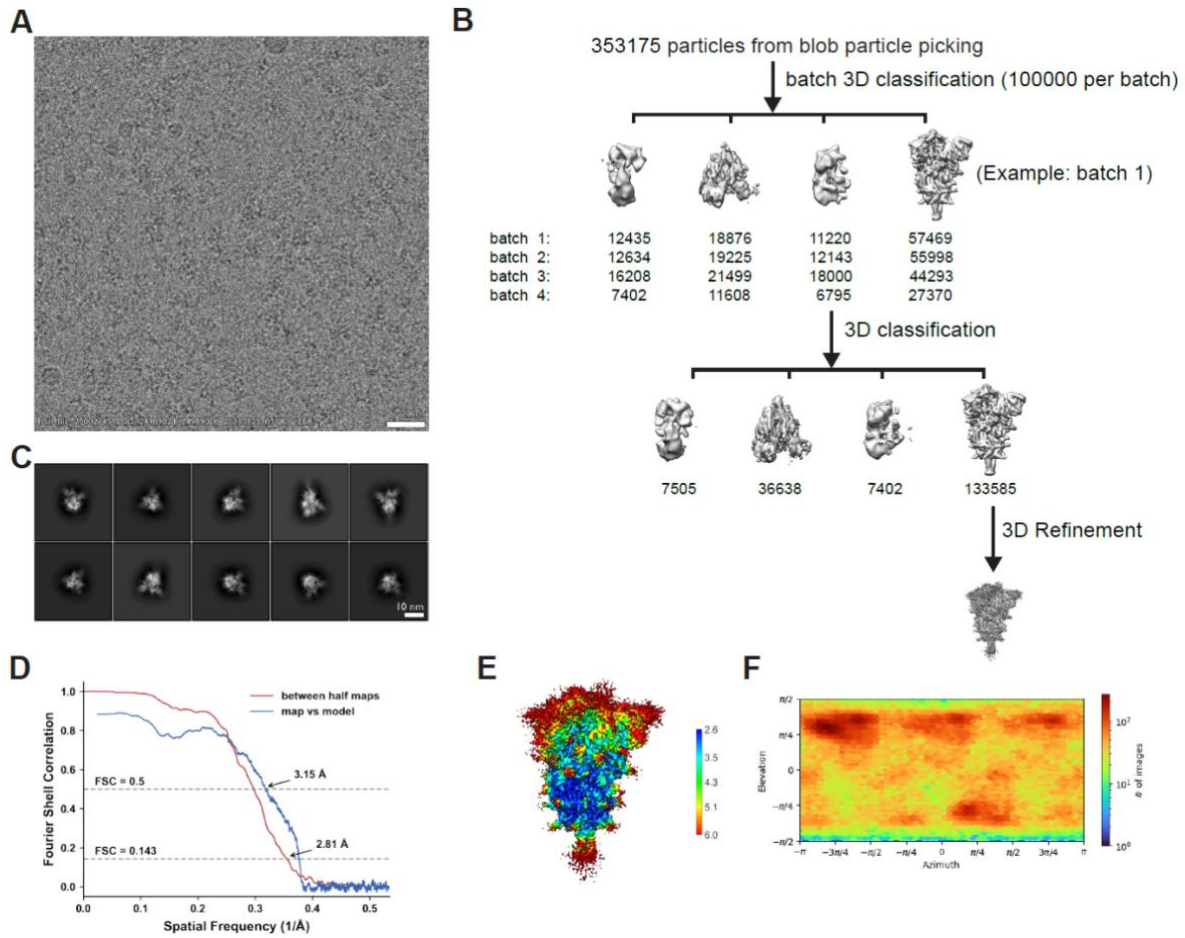

**Supplementary Figure 1. Cryo-EM data processing and validation for the XBB.1.5 spike protein ectodomain. (A) Representative cryo-EM micrograph. (B) Workflow of cryo-EM image processing. (C) Representative 2D classes. (D) FSC curves. (E) Local resolution. (F) Viewing direction distribution plot.**

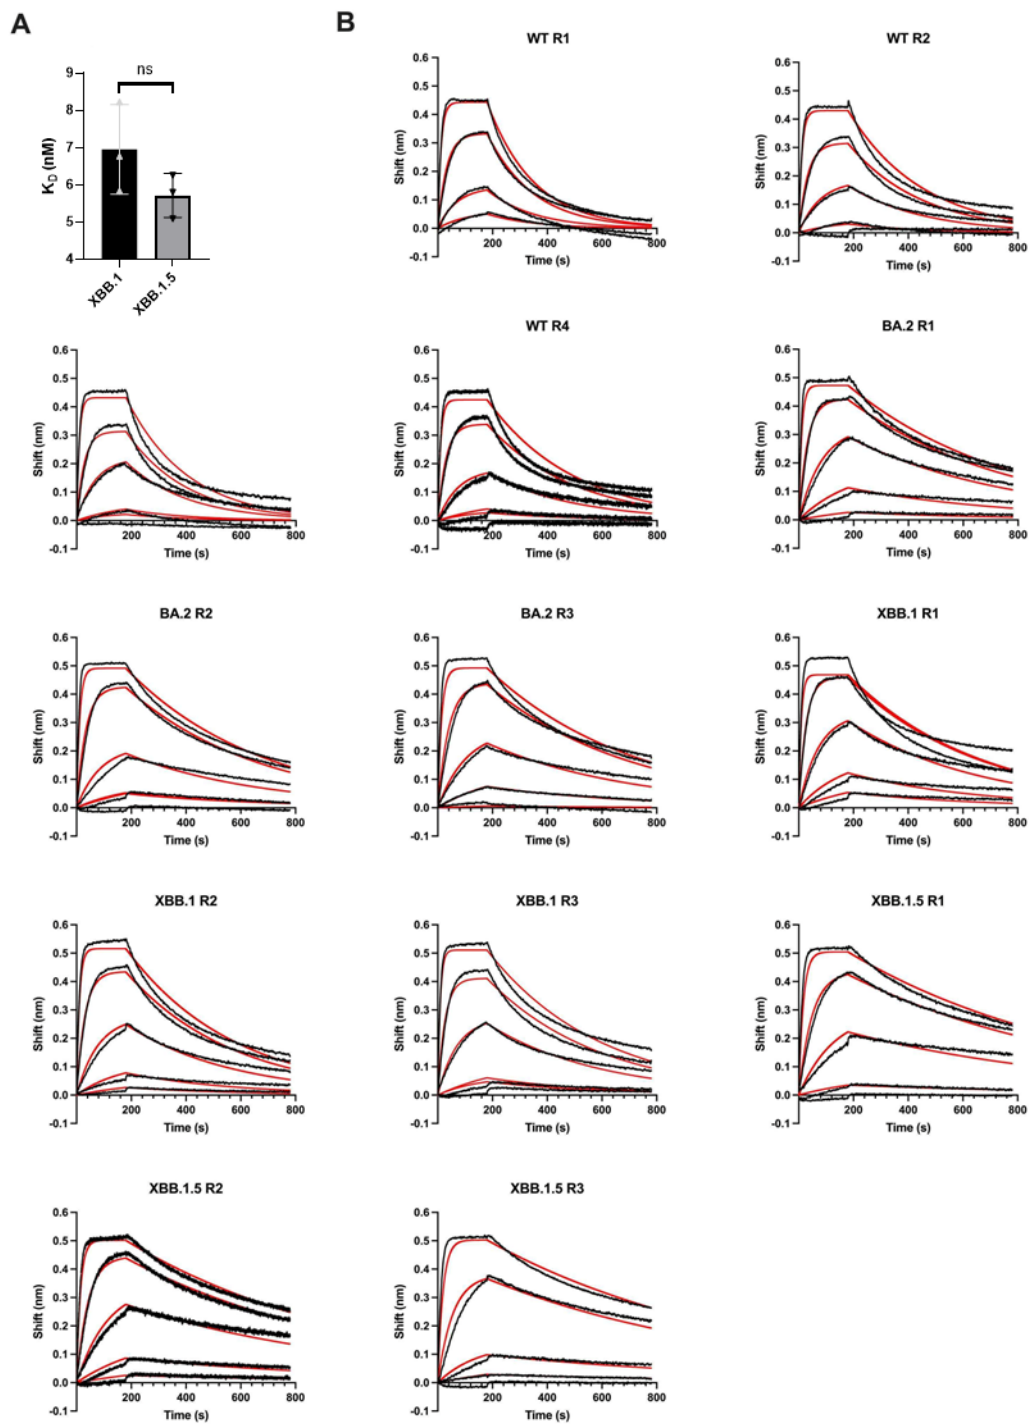

**Supplementary Figure 2.** BLI analysis of RBD – hACE2 interactions. (A) Summary of  $K_D$  values calculated for 3 experiments ( $n = 3$ ) measuring XBB.1 and XBB.1.5 RBDs binding to hACE2. Error bars denote the standard deviation of the mean. Statistical significance was assessed via students T test (2-tailed, ns: not significant with  $\alpha = 0.05$ ) The calculated  $P$  value was 0.1856. (B) BLI curves for all RBD-hACE2 data in this study (R: replicate #). Black curves represent raw data which were fit to a model using a 1:1 binding stoichiometry (red) to determine the reported dissociation constants. Source data are provided as a Source Data file.

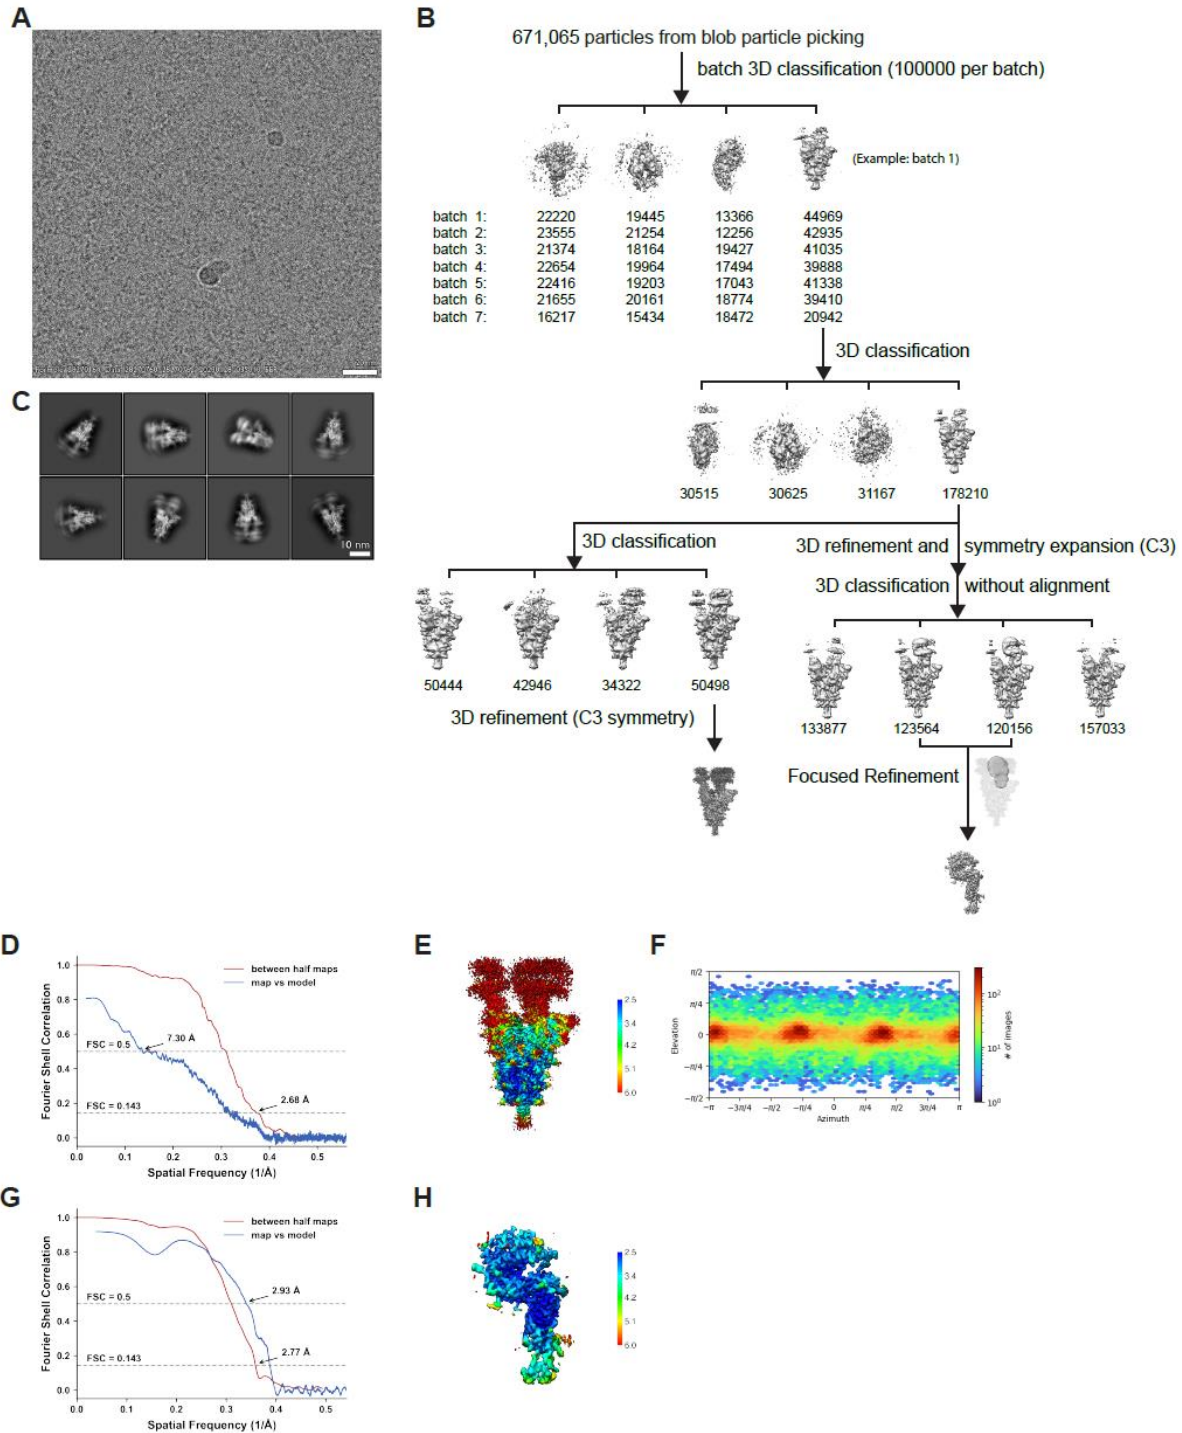

**Supplementary Figure 3. Cryo-EM data processing and validation for complex of XBB.1.5 spike protein ectodomain and human ACE2. (A)** Representative cryo-EM micrograph. **(B)** Workflow of cryo-EM image processing. **(C)** Representative 2D classes. **(D-F)** FSC curves **(D)**, local resolution **(E)** and viewing direction distribution plot **(F)** of global refinement. **(G-H)** FSC curves **(G)** and local resolution **(H)** of focused refinement.

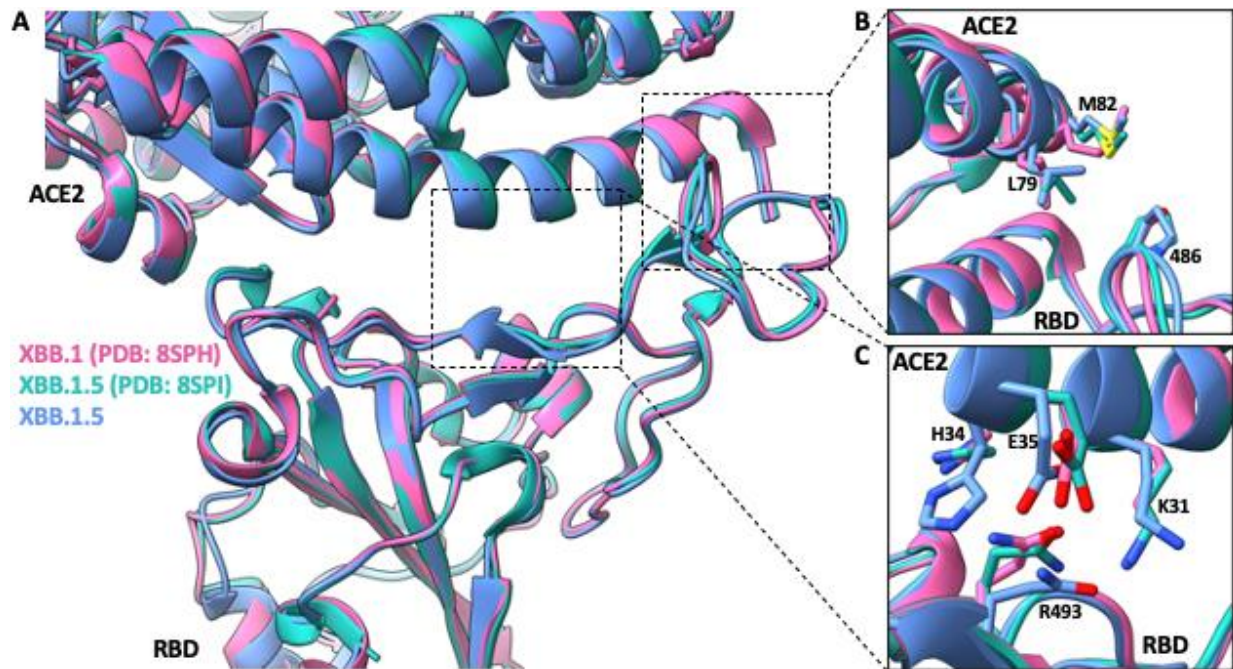

**Supplementary Figure 4. Structural alignment between previously published chimeric XBB.1 and XBB.1.5 RBD-hACE2 complexes solved by X-ray crystallography. (A)** XBB.1 (PDB ID: 8SPH), XBB.1.5 (PDB ID: 8SPI), and the focus-refined XBB.1.5 RBD - hACE2 cryoEM structure reported in this manuscript aligned by their RBDs. **(B)** Focused view on amino acid position 486 within the RBD and L79 and M82 residues within hACE2. **(C)** Focused view on residue 493 within the RBD and K31, H34, and E35 residues within hACE2.

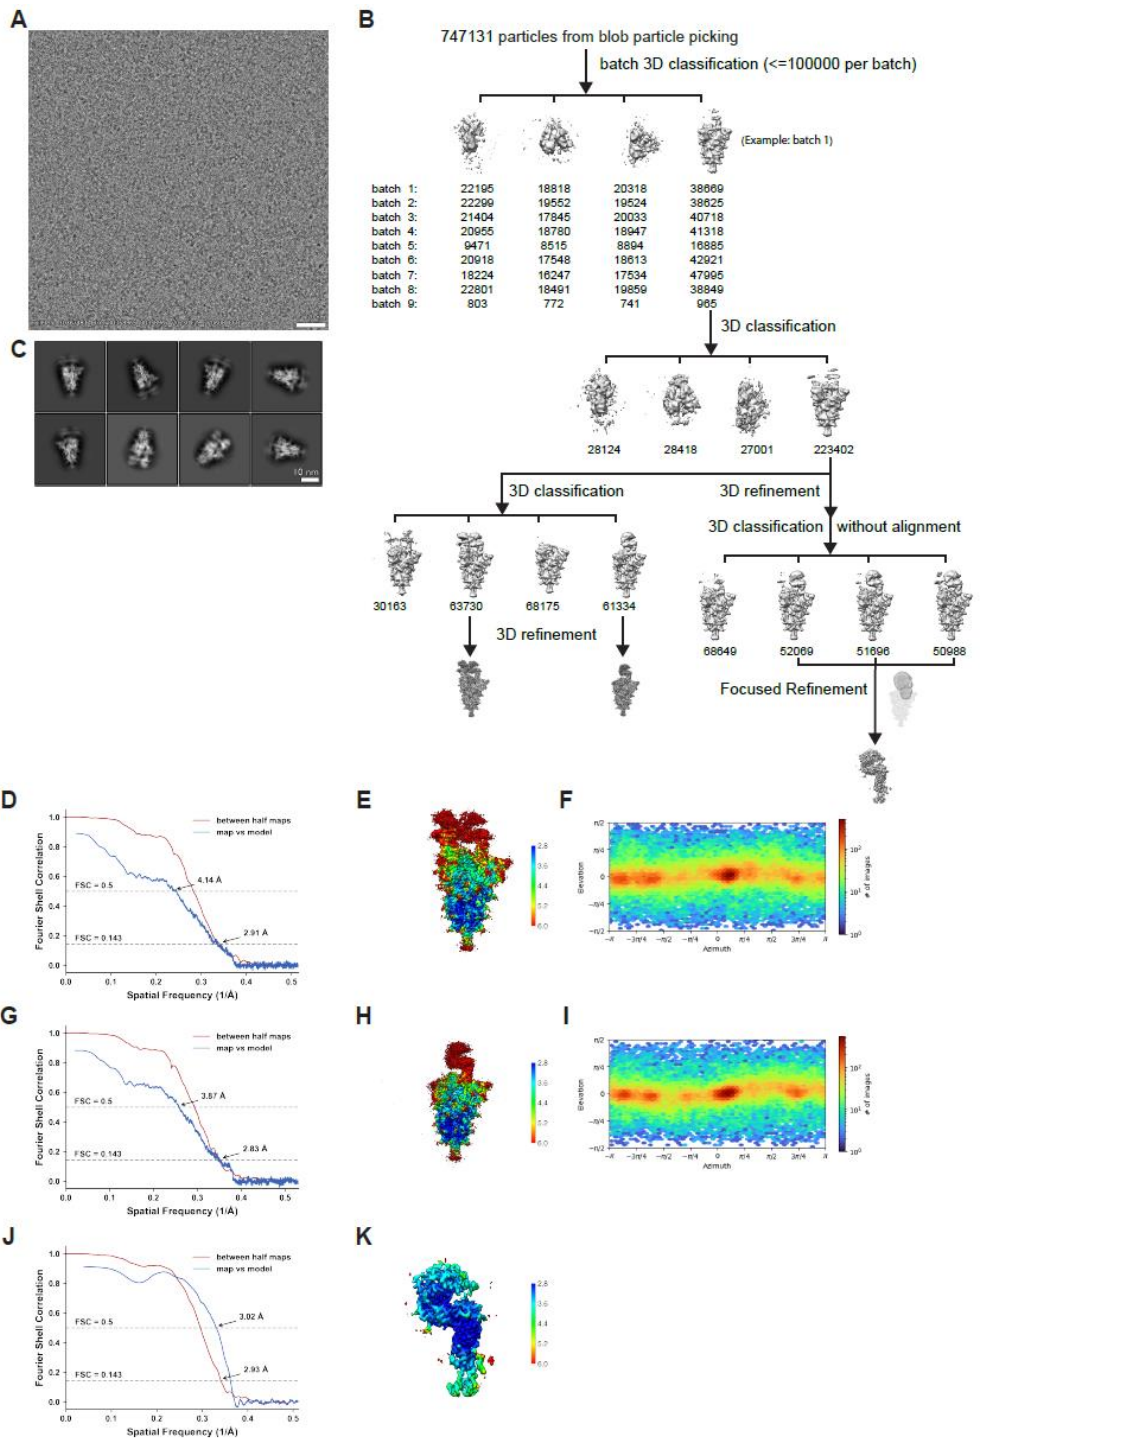

**Supplementary Figure 5. Cryo-EM data processing and validation for complex of XBB.1.5 spike protein ectodomain and mouse ACE2. (A)** Representative cryo-EM micrograph. **(B)** Workflow of cryo-EM image processing. **(C)** Representative 2D classes. **(D-F)** FSC curves **(D)**, local resolution **(E)** and viewing direction distribution plot **(F)** of two mouse ACE2 bound global refinement. **(G-I)** FSC curves **(G)**, local resolution **(H)** and viewing direction distribution plot **(I)** of one mouse ACE2 bound global refinement. **(J-K)** FSC curves **(J)**, and local resolution **(K)** of focused refinement.

**A**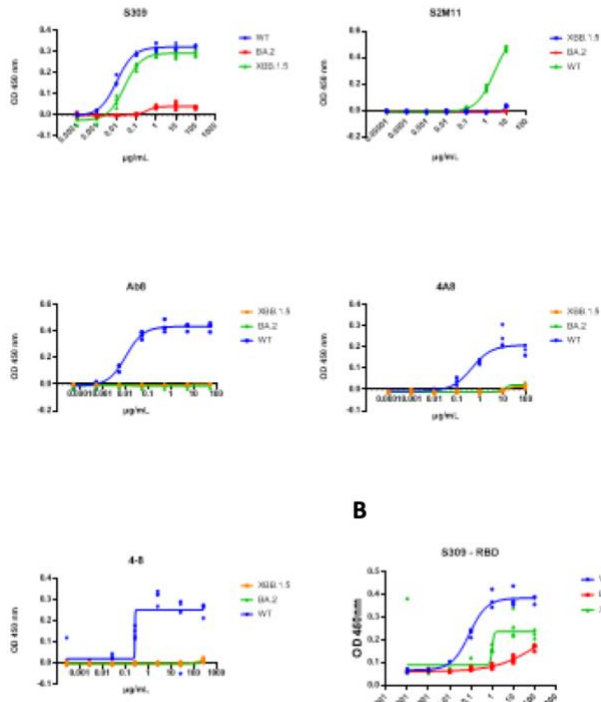**B****C**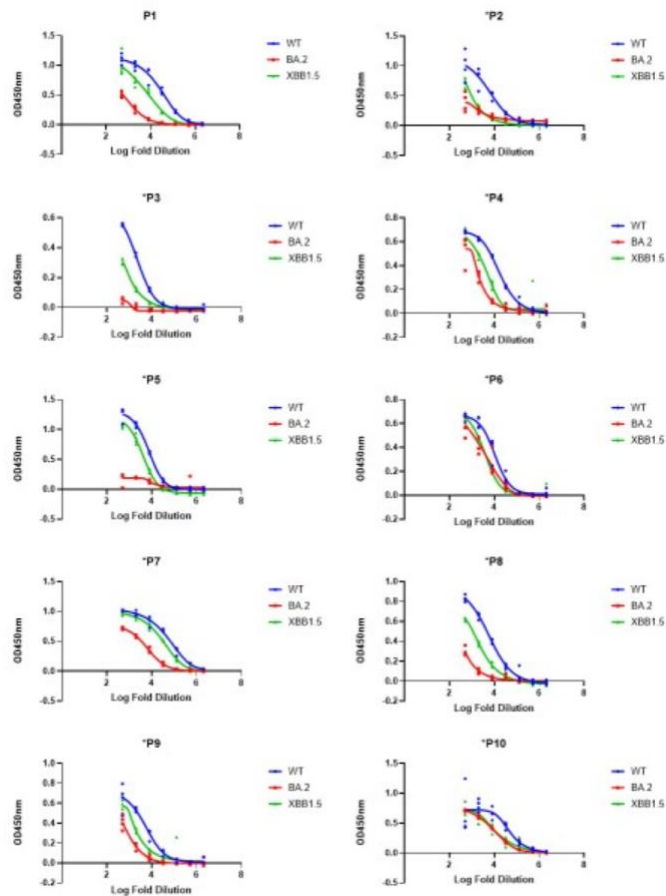

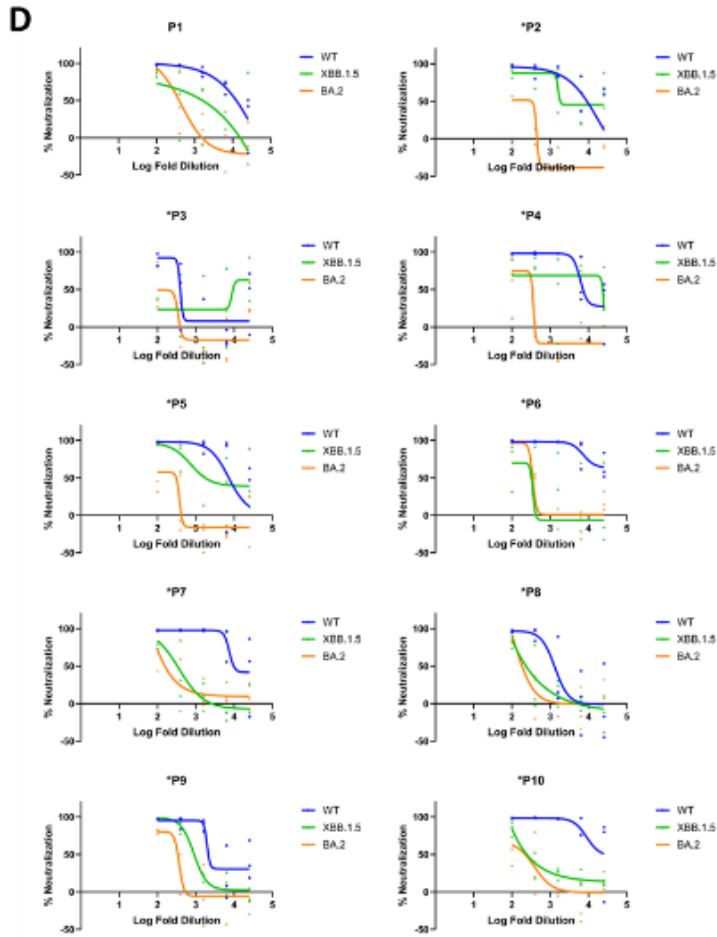

**Supplementary Figure 6. ELISA and pseudovirus neutralization data.** (A) Spike protein ELISAs for the indicated antibodies. (B) ELISA analysis of S309 binding the indicated spike protein RBDs. (C) Spike protein ELISAs using serum from donors. (D) Pseudoviral neutralization assays using serum from donors. All ELISA experiments were performed in technical quadruplicate and neutralization experiments in technical triplicate and are shown as points. Source data are provided as a Source Data file.





**Supplementary Figure 7. Negative stain electron microscopy analysis of SARS-CoV-2 spike protein immune complexes.** (A) Analysis of Fab-wild-type immune complexes. Side view and top views for each unique 3D reconstruction are shown, with representative 2D class averages below. Annotation of the antigenic regions recognized by Fab fragments in each reconstruction is provided at the top. Molecular models of spike proteins in various conformations are docked into each reconstruction (NTD bottom face reconstruction: open trimer with one RBD up and 2 down, PDB 6VYB, all others: open trimer with 3 RBDs up, PDB 7A98). (B) Representative 2D class averages of particles obtained when using bulk Fabs and the XBB.1.5 spike protein. (C) Analysis of IgG-XBB.1.5 spike protein complexes. A bulk IgG or bulk Fab-XBB.1.5 spike protein mixture was subjected to size exclusion chromatography. Traces for each injection are shown. Negative stain electron microscopy was performed on each indicated fraction from the IgG-XBB.1.5 spike protein mixture as indicated. (D) Fit of the XBB.1.5-hACE2 complex model into the obtained 3D reconstruction of an IgG-XBB.1.5 spike protein complex. Source data are provided as a Source Data file.

### Representative AIM gating - ancestral spike stimulation

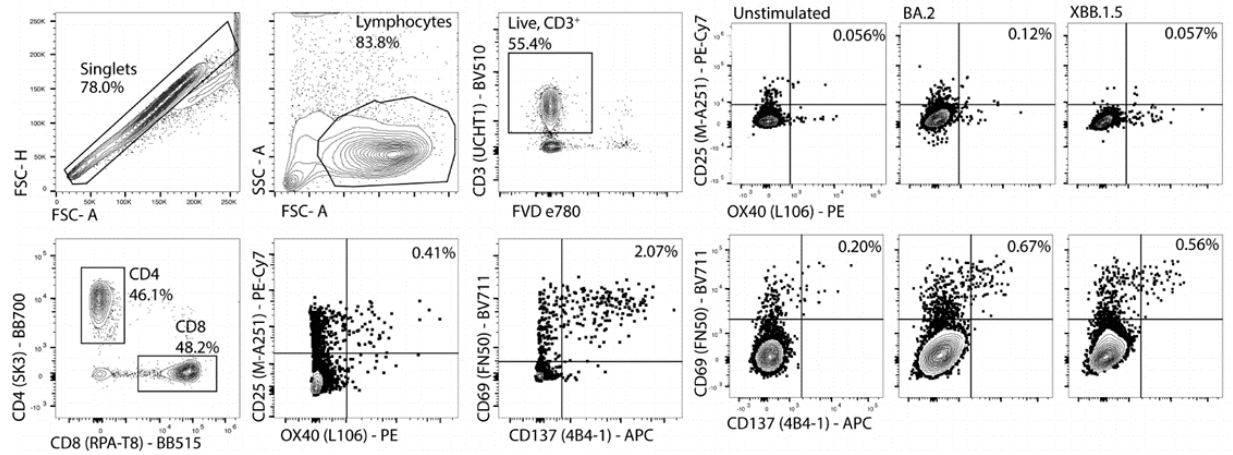

**Supplementary Figure 8. Representative gating for T cell activation induced marker assay.** FSC-H and FSC-A were used to gate single cells, followed by identification of lymphocytes using SSC-A and FSC-A. CD3 and Fixable Viability Dye (FVD) were used to gate for live T cells, which were further delineated by CD4 and CD8 expression. Antigen specific CD4<sup>+</sup> T cells were identified as CD25<sup>+</sup>OX40<sup>+</sup> and CD8<sup>+</sup> antigen specific T cells as CD69<sup>+</sup>CD137<sup>+</sup>. Representative gating is shown for ancestral spike stimulated PBMCs, antigen specific gating is shown for all stimulation conditions.

## Gated on live CD4<sup>+</sup> T cells

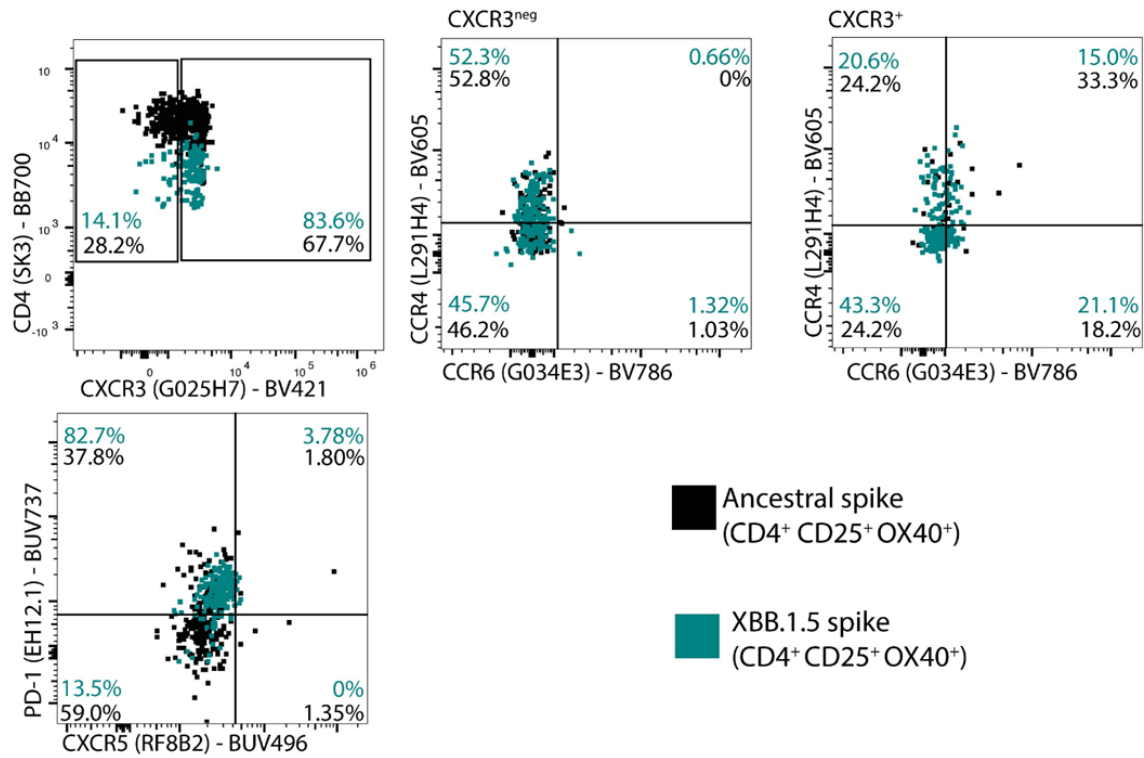

**Supplementary Figure 9. Representative gating for antigen specific CD4<sup>+</sup> T cell phenotyping** CD4<sup>+</sup> T cell phenotypic analysis was performed on samples with >30 CD25<sup>+</sup> OX40<sup>+</sup> T cells, which were analyzed for expression of CXCR3, followed by CCR4 and CCR6 expression. Th1 cells were identified as CXCR3<sup>+</sup> CCR4<sup>neg</sup> CCR6<sup>neg</sup>, Th2 cells as CXCR3<sup>neg</sup> CCR4<sup>+</sup> CCR6<sup>neg</sup>, Th9 cells as CXCR3<sup>+</sup> CCR4<sup>neg</sup> CCR6<sup>+</sup>, acute Th9 cells as CXCR3<sup>neg</sup> CCR4<sup>neg</sup> CCR6<sup>+</sup>, Th17 cells as CXCR3<sup>neg</sup> CCR4<sup>+</sup> CCR6<sup>+</sup>, Th17.1 cells as CXCR3<sup>+</sup> CCR4<sup>+</sup> CCR6<sup>+</sup>. Circulating CD4<sup>+</sup> Tfh (cTfh) cells were defined as being CXCR5<sup>+</sup> and PD-1<sup>+</sup>.

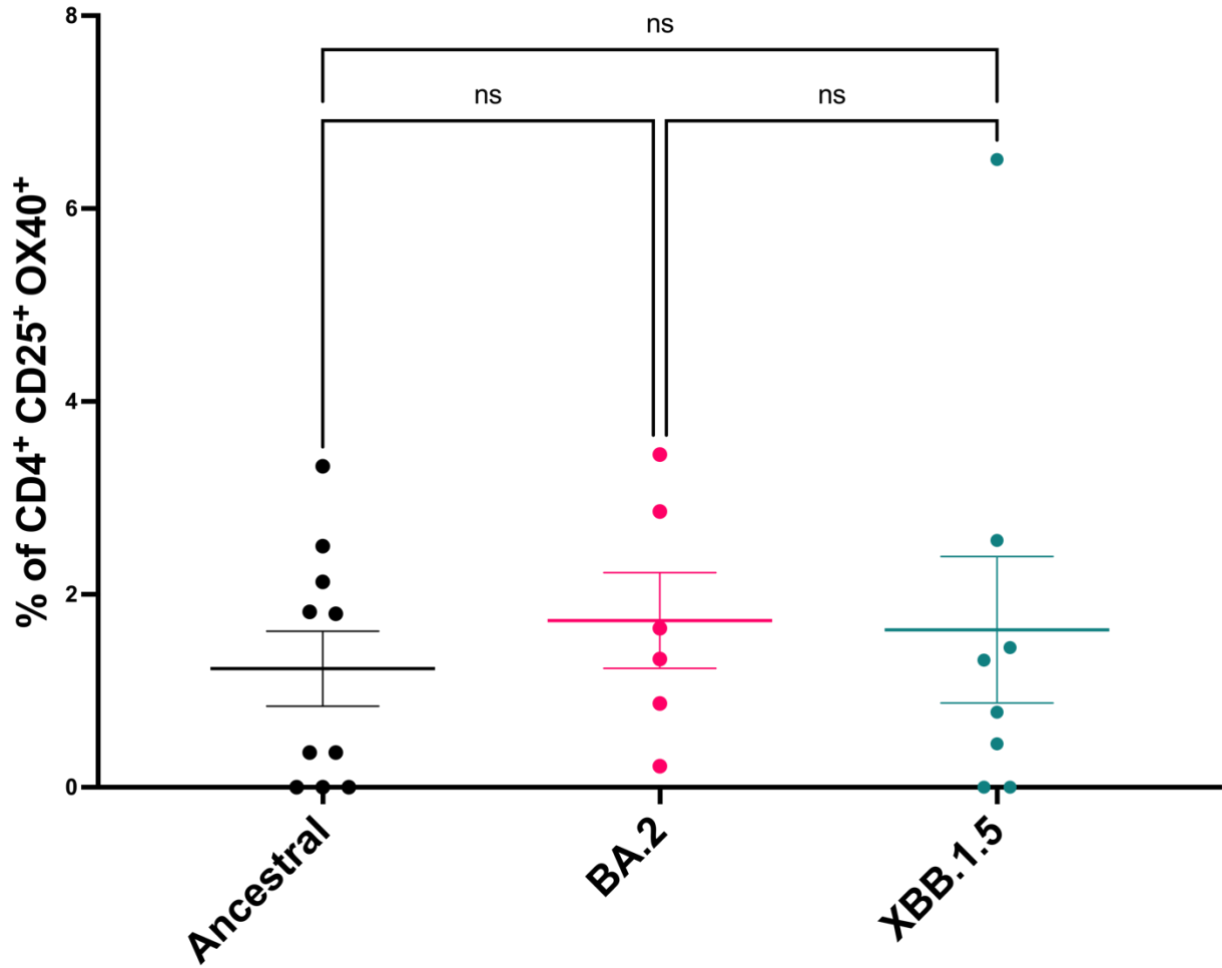

**Supplementary Figure 10. Spike specific circulating T follicular helper (cTfh) cells** CD4<sup>+</sup> T cell phenotypic analysis was performed on samples with > 30 CD25<sup>+</sup> OX40<sup>+</sup> T cells, with cTfh cells identified by surface expression of CXCR5 and PD-1. Black, Magenta, Teal points represent data for the Ancestral (wild type/WT), BA.2, and XBB.1.5 spike proteins respectively; ns: not significant. Kruskal-Wallis tests with Dunn's multiple comparisons tests were used to determine significant differences. Calculated P values are as follows: WT vs BA.2:  $P > 0.9999$ , WT vs XBB.1.5:  $P > 0.9999$ , BA.2 vs XBB.1.5:  $P = 0.6826$ . Source data are provided as a Source Data file.

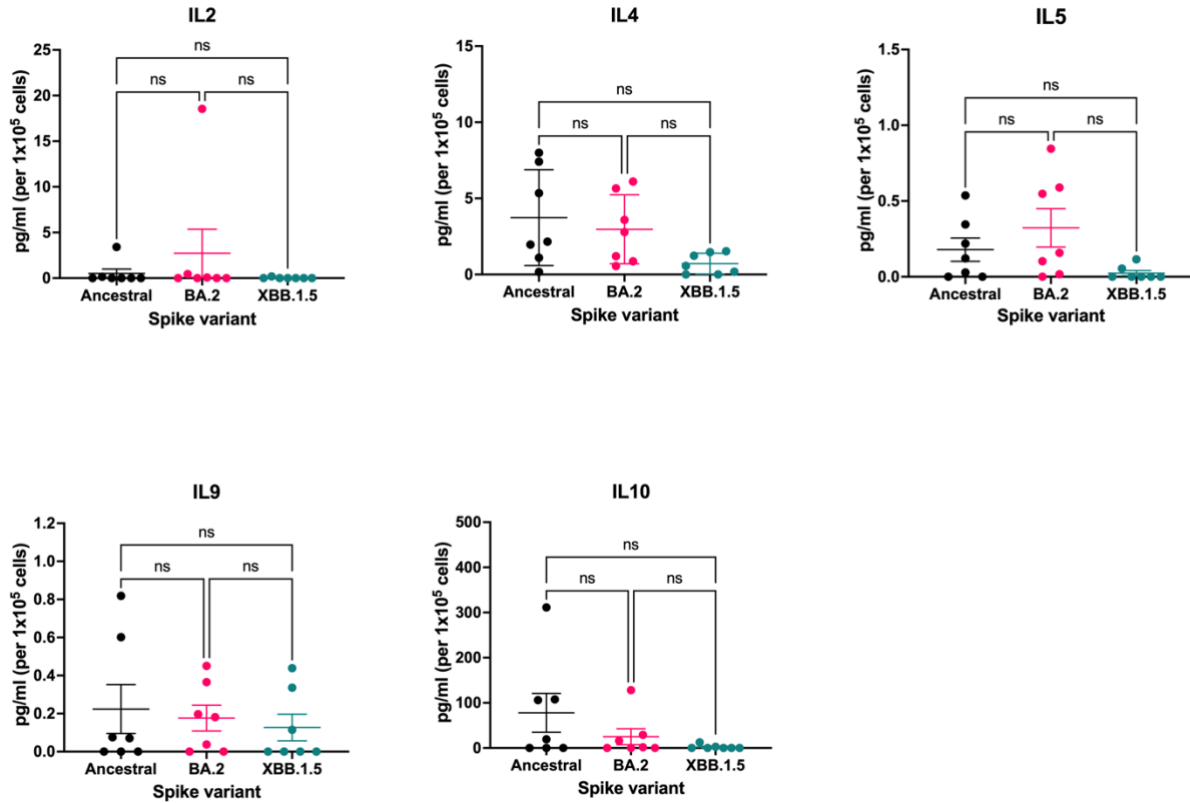

**Supplementary Figure 11. Cytokine levels following stimulation of PBMCs with spike proteins** Cell culture supernatants from 44-hour spike stimulated PBMCs were analyzed using a LEGENDPlex assay. Unstimulated cytokine levels were subtracted from each condition and concentrations (pg/ml) were normalized to 10<sup>5</sup> cells. Black, Magenta, Teal points represent data for the Ancestral (wild type/WT), BA.2, and XBB.1.5 spike proteins respectively; ns: not significant. Kruskal-Wallis tests with Dunn's multiple comparisons tests were used to determine significant differences. Calculated P values are as follows: (IL2:  $P = 0.4905$ ), (IL4:  $P = 0.0602$ ), (IL5: WT vs BA.2 ( $P > 0.9999$ ), WT vs XBB.1.5 ( $P = 0.2900$ ), BA.2 vs XBB.1.5 ( $P = 0.0503$ ), (IL9:  $P = 0.7132$ ), (IL10:  $P = 0.2571$ ). Source data are provided as a Source Data file.

Supplementary Table 1. Data collection and processing parameters, refinement, and validation statistics.

| Structure:                                      | S(XBB.1.5)        | S(XBB.1.5) + hACE2 |                  | S(XBB.1.5) + mACE2  |                     |                  |
|-------------------------------------------------|-------------------|--------------------|------------------|---------------------|---------------------|------------------|
|                                                 | global refinement | global refinement  | focus refinement | global refinement 1 | global refinement 2 | focus refinement |
|                                                 | EMD-43320         | EMD-43324          | EMD-43325        | EMD-43321           | EMD-43322           | EMD-43323        |
|                                                 | PDB ID: 8VKK      | PDB ID: 8VKO       | PDB ID: 8VKP     | PDB ID: 8VKL        | PDB ID: 8VKM        | PDB ID: 8VKN     |
| <b>Data collection</b>                          |                   |                    |                  |                     |                     |                  |
| Microscope                                      | Titan Krios G4    |                    | Titan Krios G4   |                     | Titan Krios G4      |                  |
| Detector                                        | Falcon4           |                    | Falcon4          |                     | Falcon4             |                  |
| Voltage (kV)                                    | 300               |                    | 300              |                     | 300                 |                  |
| Nominal magnification                           | 155,000           |                    | 155,000          |                     | 155,000             |                  |
| Defocus range ( $\mu\text{m}$ )                 | -2.0 to -0.5      |                    | -2.0 to -0.5     |                     | -2.0 to -0.5        |                  |
| Physical pixel ( $\text{\AA}$ )                 | 0.5               |                    | 0.5              |                     | 0.5                 |                  |
| Electron dose ( $e^-/\text{\AA}^2$ )            | 40                |                    | 40               |                     | 40                  |                  |
| Exposure rate ( $e^-/\text{\AA}^2/\text{sec}$ ) | 24                |                    | 24               |                     | 24                  |                  |
| Format of movies                                | EER               |                    | EER              |                     | EER                 |                  |
| Number of raw frames                            | 413               |                    | 413              |                     | 413                 |                  |
| Number of movies                                | 4,185             |                    | 8,064            |                     | 9,152               |                  |
| <b>Data processing</b>                          |                   |                    |                  |                     |                     |                  |
| Number of fractions                             | 40                |                    | 40               |                     | 40                  |                  |
| Number of extracted particles                   | 353,175           |                    | 671,065          |                     | 747,131             |                  |
| Number of particles for final map               | 133,585           |                    | 50,498           |                     | 243,720*            |                  |
| Symmetry imposed                                | C1                |                    | C3               |                     | C1                  |                  |
| Resolution ( $\text{\AA}$ )                     | 2.81              |                    | 2.68             |                     | 2.77                |                  |
| FSC threshold                                   | 0.143             |                    | 0.143            |                     | 0.143               |                  |
| <b>Refinement</b>                               |                   |                    |                  |                     |                     |                  |
| Initial model used                              | 8DM1              |                    | 8DM1,8DM6        |                     | 8DM6                |                  |
| Map sharpening B-factor ( $\text{\AA}^2$ )      | 47.6              |                    | 40.7             |                     | 72.8                |                  |
| Composition (#)                                 |                   |                    |                  |                     |                     |                  |
| Atoms                                           | 23,808            |                    | 40,293           |                     | 6,577               |                  |
| Residues                                        | 2,944             |                    | 4,926            |                     | 796                 |                  |
| Ligands                                         | NAG:56            |                    | NAG:81           |                     | NAG:9               |                  |
| B-factor ( $\text{\AA}^2$ )                     |                   |                    |                  |                     |                     |                  |
| Protein                                         | 123.88            |                    | 111.95           |                     | 101.84              |                  |
| Ligand                                          | 123.33            |                    | 100.91           |                     | 111.02              |                  |
| Bonds (RMSD)                                    |                   |                    |                  |                     |                     |                  |
| Length ( $\text{\AA}$ ) (# > $4\sigma$ )        | 0.009 (0)         |                    | 0.005 (0)        |                     | 0.007 (0)           |                  |
| Angles ( $^\circ$ ) (# > $4\sigma$ )            | 0.948 (9)         |                    | 0.883 (9)        |                     | 0.997 (1)           |                  |
| CC mask                                         | 0.80              |                    | 0.46             |                     | 0.82                |                  |
| <b>Validation</b>                               |                   |                    |                  |                     |                     |                  |
| Ramachandran plot                               |                   |                    |                  |                     |                     |                  |
| Residues favored (%)                            | 98.06             |                    | 97.41            |                     | 96.84               |                  |
| Residues disallowed (%)                         | 0.00              |                    | 0.00             |                     | 0.00                |                  |
| Rotamer outliers (%)                            | 0.58              |                    | 1.06             |                     | 1.14                |                  |
| Clash score                                     | 3.64              |                    | 3.16             |                     | 3.35                |                  |
| MolProbity score                                | 1.15              |                    | 1.24             |                     | 1.36                |                  |

\* particles are derived from symmetry expansion and 3D classification without alignment.

Supplementary Table 2. Donor demographics for serum and PMBC studies. The average age of donors is 31.7 years.

| ID | Sex | Vaccine type                                | Number of doses | Bivalent | Previous Infection | Infection date estimate |
|----|-----|---------------------------------------------|-----------------|----------|--------------------|-------------------------|
| 1  | m   | AZ (ChAdOx1-S) + 4 Moderna (mRNA-1273)      | 5               | Y        | Y                  | n/a                     |
| 2  | f   | Covax                                       | 2               | N        | Y                  | May-21                  |
| 3  | f   | Pfizer (BNT162b2)                           | 3               | n/a      | Y                  | n/a                     |
| 4  | m   | Pfizer (BNT162b2 x 3 + Moderna (mRNA-1273)  | 4               | Y        | Y                  | Mar-22                  |
| 5  | f   | Pfizer (BNT162b2)                           | 4               | Y        | Y                  | Jan-22                  |
| 6  | f   | Pfizer (BNT162b2)                           | 4               | Y        | Y                  | n/a                     |
| 7  | f   | Pfizer (BNT162b2) x2 Moderna (mRNA-1273) x1 | 3               | N        | Y                  | Aug-22                  |
| 8  | m   | Moderna (mRNA-1273)                         | 2               | N        | Y                  | ancestral               |
| 9  | m   | Pfizer (BNT162b2)                           | 4               | Y        | Y                  | Jan-22                  |
| 10 | f   | Moderna (mRNA-1273)/Pfizer (BNT162b2)       | 3               | Y        | Y                  | Jan-22                  |



Supplementary Table 3. mAb panel for T cell assays

| Target | Fluorochrome | Clone  | Company        | Dilution |
|--------|--------------|--------|----------------|----------|
| CXCR5  | BUV496       | RF8B2  | BD Biosciences | 1:100    |
| PD-1   | BUV737       | EH12.1 | BD Biosciences | 1:100    |
| CXCR3  | BV421        | G025H7 | Biolegend      | 1:100    |
| CD3    | BV510        | UCHT1  | BD Biosciences | 1:200    |
| CCR4   | BV605        | L291H4 | Biolegend      | 1:200    |
| CD69   | BV711        | FN50   | Biolegend      | 1:100    |
| CCR6   | BV786        | G034E3 | Biolegend      | 1:100    |
| CD8    | BB515        | PA-T8  | BD Biosciences | 1:200    |
| CD4    | BB700        | SK3    | BD Biosciences | 1:200    |
| OX40   | PE           | L106   | BD Biosciences | 1:10     |
| CD39   | PE-Dazzle594 | A1     | Biolegend      | 1:100    |
| CD25   | PE-Cy7       | M-A251 | BD Biosciences | 1:40     |
| CD137  | APC          | 4B4-1  | Biolegend      | 1:100    |
| FVD    | eFluor 780   | NA     | ThermoFisher   | 1:1000   |
